# Supplementary material for: Loss of the interaction between estradiol and insulin-like growth factor I in brain endothelial cells associates to changes in mood homeostasis during peri-menopause in mice
Source: publisher site journal article supplement (doi:10.18632/aging.101739), 2019-01-11
Supplement: Supplementary file [file aging-v11i1-101739-supplementary-material-SD1.pdf]

## SUPPLEMENTARY FIGURE

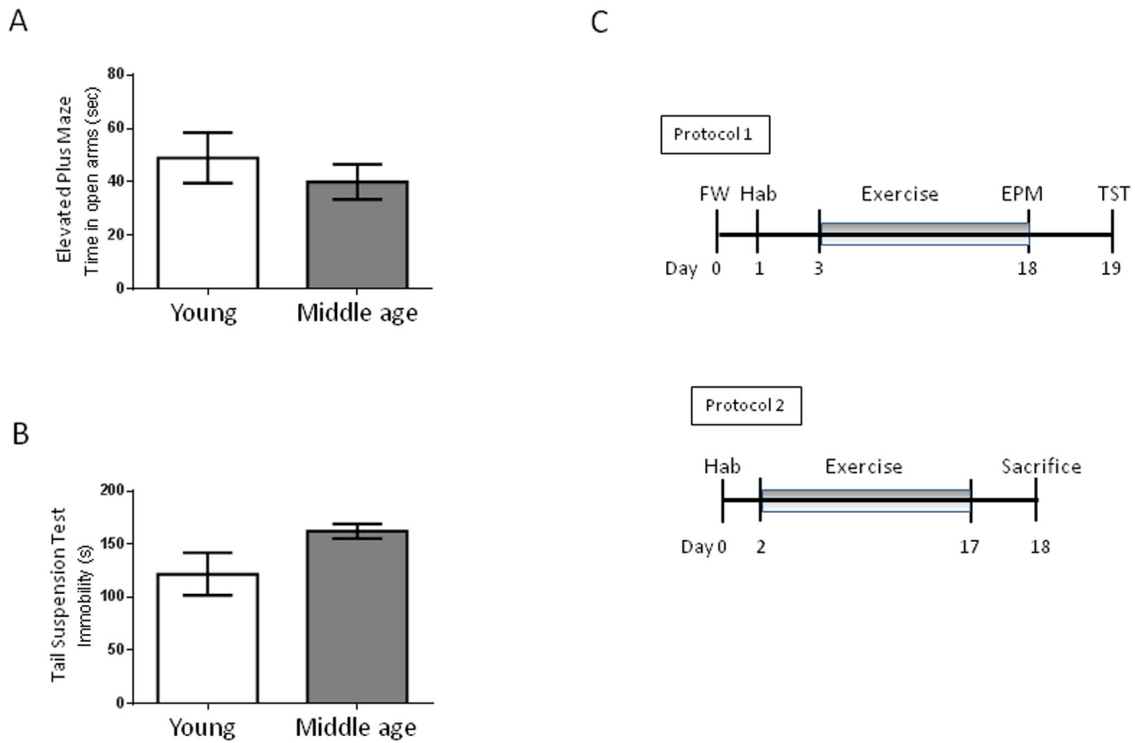

**Supplementary Figure 1.** (A) No differences in anxiety levels were found between young (2 months) and middle-aged (9 months) female mice, as determined by time spent in the open arms of the elevated plus maze. (B) No differences were observed either between young and middle-aged females in resilience to stress, as measured by time of immobility in the tail suspension test administered after forced swim. (C) Experimental design used in middle-aged female mice. Time line of the 2 experimental protocols used in the study. Hab: habituation to treadmill running; FW: forced swim; EPM: elevated plus maze; TST: tail suspension test.
